# Supplementary material
Source: Springer Nature journal article supplement (https://www.springermedizin.de/resource/supplementary/13063_2011_670_MOESM1_ESM.pdf/9618472)

**Screening and  
Pre-treatment**

**Process**

**Post-treatment**

**Follow-up (fu)**

**T0a** Pre-  
screening by  
therapist

**T0b** Screening  
and pre-  
treatment  
assessment (face  
to face) <sup>1) 2) 3) 5) 6)</sup>  
<sup>7)</sup>

**T1** After 8  
weeks of  
treatment  
(postal) <sup>3) 4)</sup>

**T2** After 15  
weeks of  
treatment  
(postal) <sup>3) 4)</sup>

**T3** After 25 sessions  
assessment (face to  
face) <sup>1) 3) 4) 5) 6) 7)</sup>

<sup>8)</sup> **T4** post-  
treatment  
assessment  
(postal) <sup>3) 4) 5)</sup>

**T5** 6 month fu  
assessment  
(postal) <sup>3) 5) 6)</sup>

**T6** 12 month fu  
assessment (face  
to face) <sup>1) 3) 5) 6) 7)</sup>

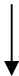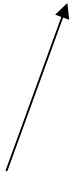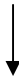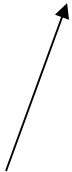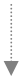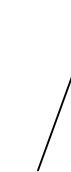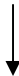

Supplement: MOESM1 [file 9618472]
